# Supplementary material for: Prolonged life of human acute hippocampal slices from temporal lobe epilepsy surgery
Source: PubMed Central journal article supplement (PMC5841387; doi:10.1038/s41598-018-22554-9), 2018-03-07
Supplement: 41598_2018_22554_MOESM1_ESM.pdf [file 41598_2018_22554_MOESM1_ESM.pdf]

1 **Supplementary Figures and Tables**

2

3 **Prolonged life of human acute hippocampal slices from temporal lobe epilepsy**  
4 **surgery**

5

6 Wickham J<sup>1</sup>, G Brödjegård N<sup>1</sup>, Vighagen R<sup>1</sup>, Pinborg LH<sup>2</sup>, Bengzon J<sup>3,4</sup>, Woldbye DPD<sup>5</sup>,  
7 Kokaia M<sup>1</sup> and Andersson M<sup>1</sup>

8

9 **Affiliation.** <sup>1</sup>Epilepsy Centre, Department of Clinical Sciences, Lund University,  
10 Sölvegatan 17, 223 62 Lund, Sweden. <sup>2</sup> Epilepsy Clinic and Neurobiology Research Unit,  
11 Department of Neurology, Copenhagen University Hospital, Rigshospitalet, Building  
12 6931, Blegdamsvej 9, DK-2100, Copenhagen, Denmark. <sup>3</sup>Department of Clinical Sciences,  
13 Lund University, Skåne University Hospital Lund, S-22185 Lund, Sweden. <sup>4</sup>Lund Stem  
14 Cell Center, BMC B10, Klinikgatan 26, 221 84 Lund, Sweden <sup>5</sup>Laboratory of  
15 Neuroplasticity, Center for Neuroscience, University of Copenhagen, Copenhagen,  
16 Denmark.

17

18

19

20

21

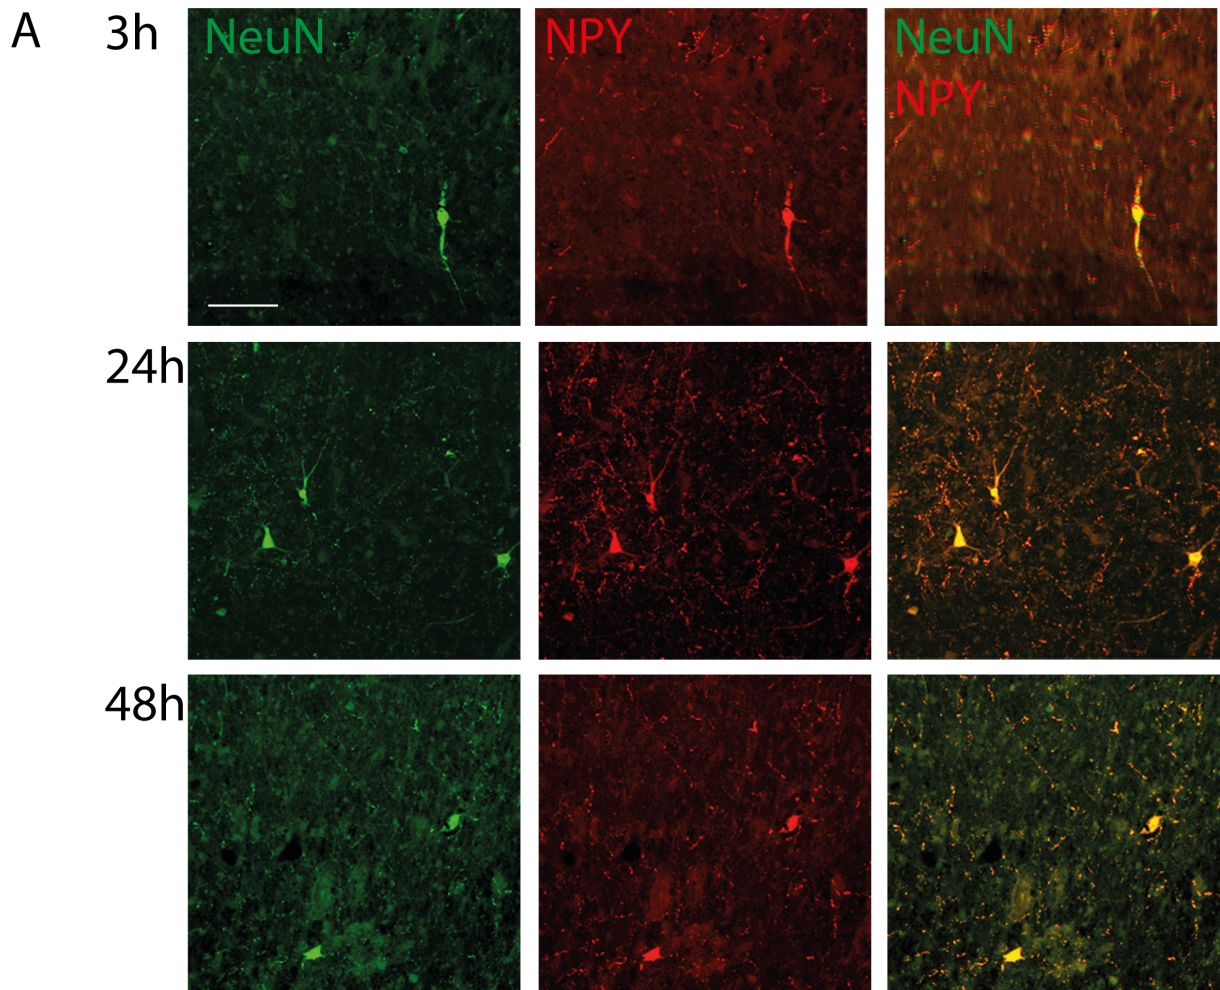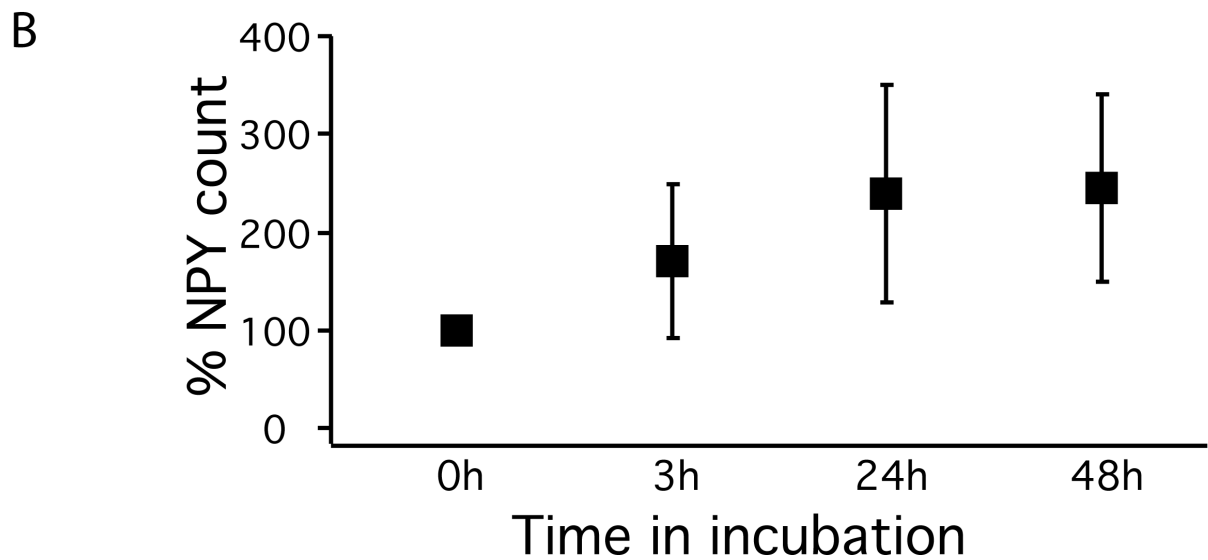

22

23 **Supplementary Figure 1. No change in NPY-containing hilar interneuron number**  
 24 **during time in incubation.** An Example immunostainings from the same patient  
 25 (number 14) in brain slices incubated for 3, 24 or 48 h. Scale bar 100 um. B, Average of  
 26 NPY-containing neurons/mm<sup>2</sup> normalized to 0h (0h: 4 patients, 24h: 3 patients and 48h:  
 27 4 patients).

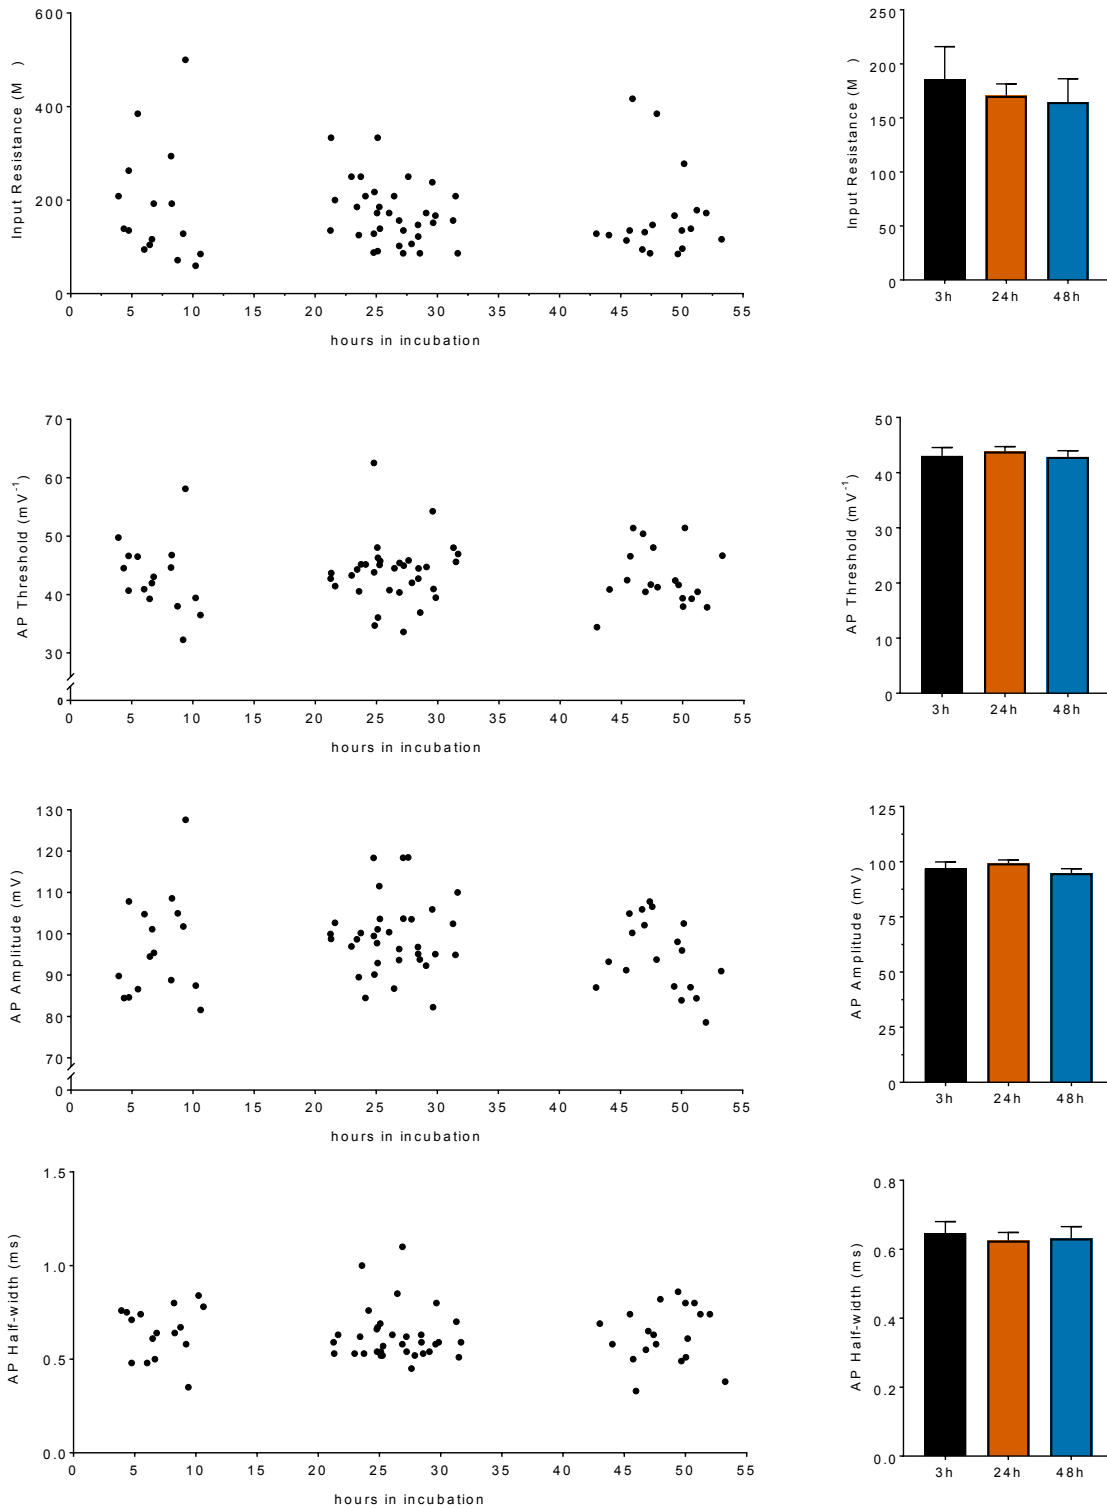

29

30 **Supplementary Figure 2. Intrinsic properties of granule cells are stable over**  
 31 **incubation time**

32 No changes can be detected in input resistance or AP properties between the three slice  
 33 incubation time points of 3, 24 and 48 hours (Average and SEM values for each group for

34 respective parameters can be found in table 2). (A) To the left, input resistance values  
35 for each individual cells are plotted against the actual time for incubation (not binned),  
36 to the right the average and SEM from the three groups 3, 24 and 48 hours (binned)  
37 show no difference between the three groups (3, 24 and 48 hours of incubation,  $n = 16,$   
38  $34$  and  $19$  respectively, Kruskal-Wallis test,  $p = 0.5691$ ). (B) To the left AP threshold for  
39 each individual cells is plotted against the actual time in incubation (not binned), while  
40 to the right the average and SEM (binned) from the three groups 3, 24 and 48 hours  
41 show no difference between the groups (3, 24 and 48 hours of incubation,  $n = 16,$   $34$  and  
42  $19$  respectively, Kruskal-Wallis test,  $p = 0.6304$ ). (C) To the left AP amplitude for each  
43 individual cells is plotted against the actual time in incubation (not binned), to the right  
44 the average and SEM from the three groups 3, 24 and 48 hours (binned) show no  
45 difference between the groups (3, 24 and 48 hours of incubation,  $n = 16,$   $34$  and  $19$   
46 respectively, Kruskal-Wallis test,  $p = 0.3424$ ). (D) To the left AP half-width for each  
47 individual cells is plotted against the actual time in incubation (not binned), to the right  
48 the average and SEM (binned) from the three groups 3, 24 and 48 hours show no  
49 difference between the groups (3, 24 and 48 hours of incubation,  $n = 16,$   $34$  and  $19$   
50 respectively, Kruskal-Wallis test,  $p = 0.5849$ ).

51

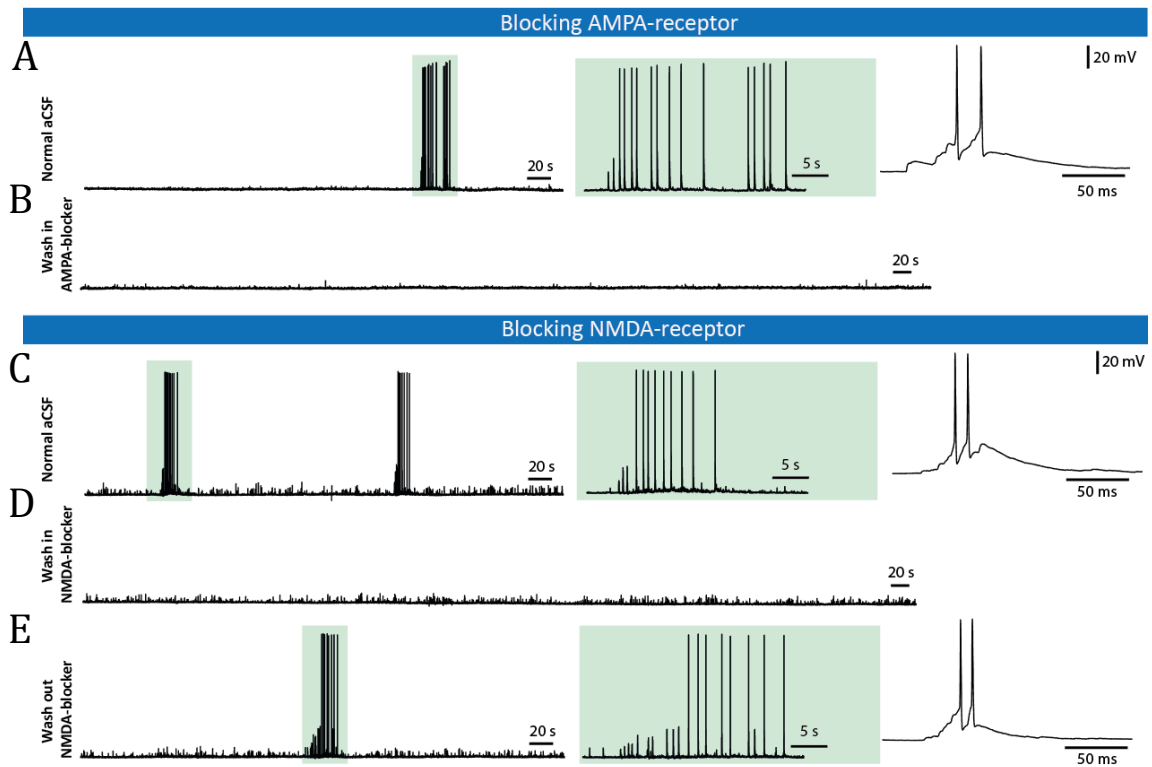

53

54 **Supplementary Figure 3. Abolishing spontaneous epileptiform activity by blocking**  
 55 **NMDA or AMPA receptors.**

56 (A) Spontaneous epileptiform activity was observed as burst trains in normal aCSF. (B)  
 57 After applying AMPA receptor antagonist NBQX to the perfusion medium, burst trains  
 58 were abolished. (C) In another cell, spontaneous epileptiform activity of burst trains (D)  
 59 was abolished by NMDA receptor antagonist D-APV application. (E) After wash-out of D-  
 60 APV, burst trains reappeared.

61

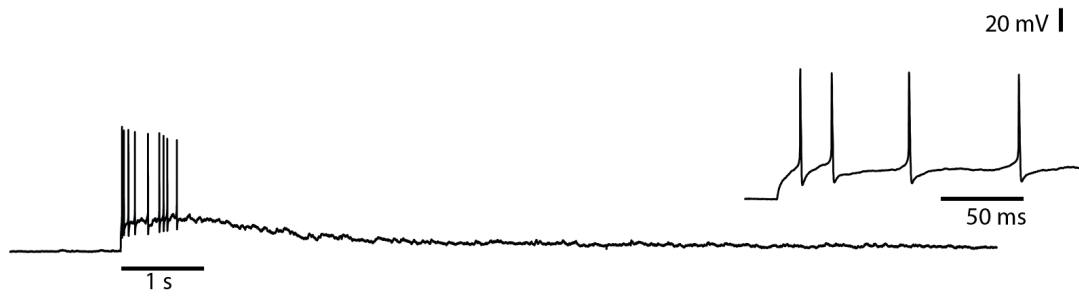

62

63 **Supplementary Figure 4. Epileptiform activity evoked by [0Mg<sup>2+</sup>]-aCSF and**  
64 **electrical stimulations**

65 Combining [0Mg<sup>2+</sup>]-aCSF and electrical stimulations resulted in a few non-recurrent  
66 bursts.

67

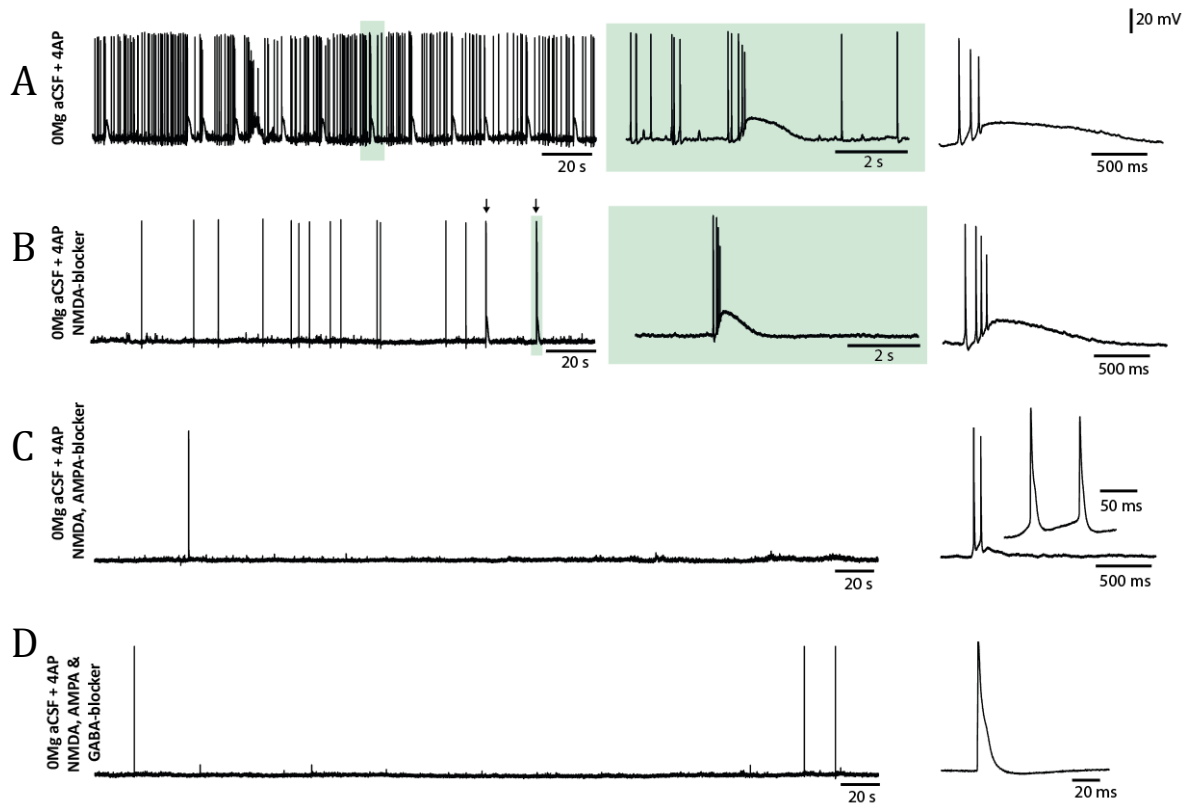

68

69 **Supplementary Figure 5. Abolishing evoked epileptiform activity by blocking**  
 70 **NMDA, AMPA and GABA receptors**

71 (A) Epileptiform burst activity evoked by [0Mg<sup>2+</sup>]/4AP-aCSF recorded from a granule  
 72 cells of a slice incubated for 48h. The green area highlights one of the bursts with faster  
 73 timescale. (B) The bursting activity is reduced when the NMDA receptor antagonist D-  
 74 APV is applied, arrows indicating the only two bursts in the recording. (C) When the  
 75 AMPA receptor antagonist NBQX was added only one short burst was recorded from the  
 76 cell, while after application of the GABA receptor antagonist PTX (D) only a few single  
 77 APs were present and the burst activity was completely abolished.

78

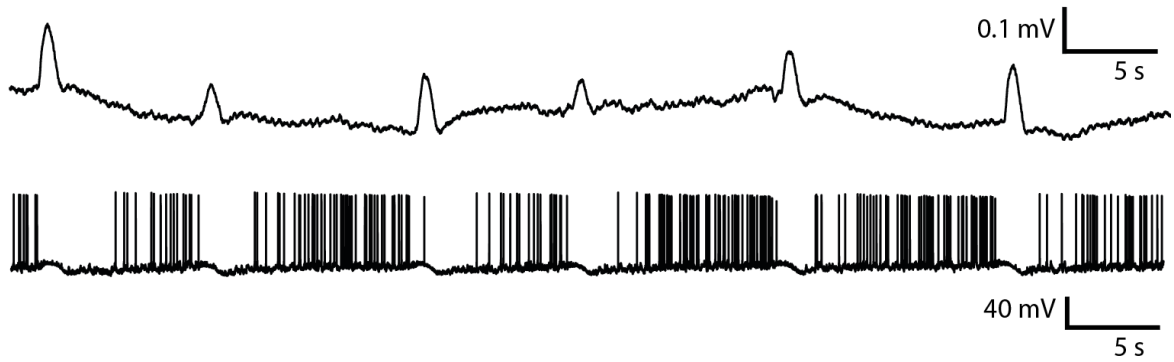

79

80 **Supplementary Figure 6. Epileptiform activity evoked by [0Mg<sup>2+</sup>]/4AP-aCSF**  
81 **recorded from a dentate granular cell and field simultaneously**

82 Field recordings from the molecular layer of the dentate gyrus display recurrent  
83 epileptiform waves that are synchronised with burst-hyperpolarizing sequence  
84 recorded simultaneously in a dentate granule cell.

85

86



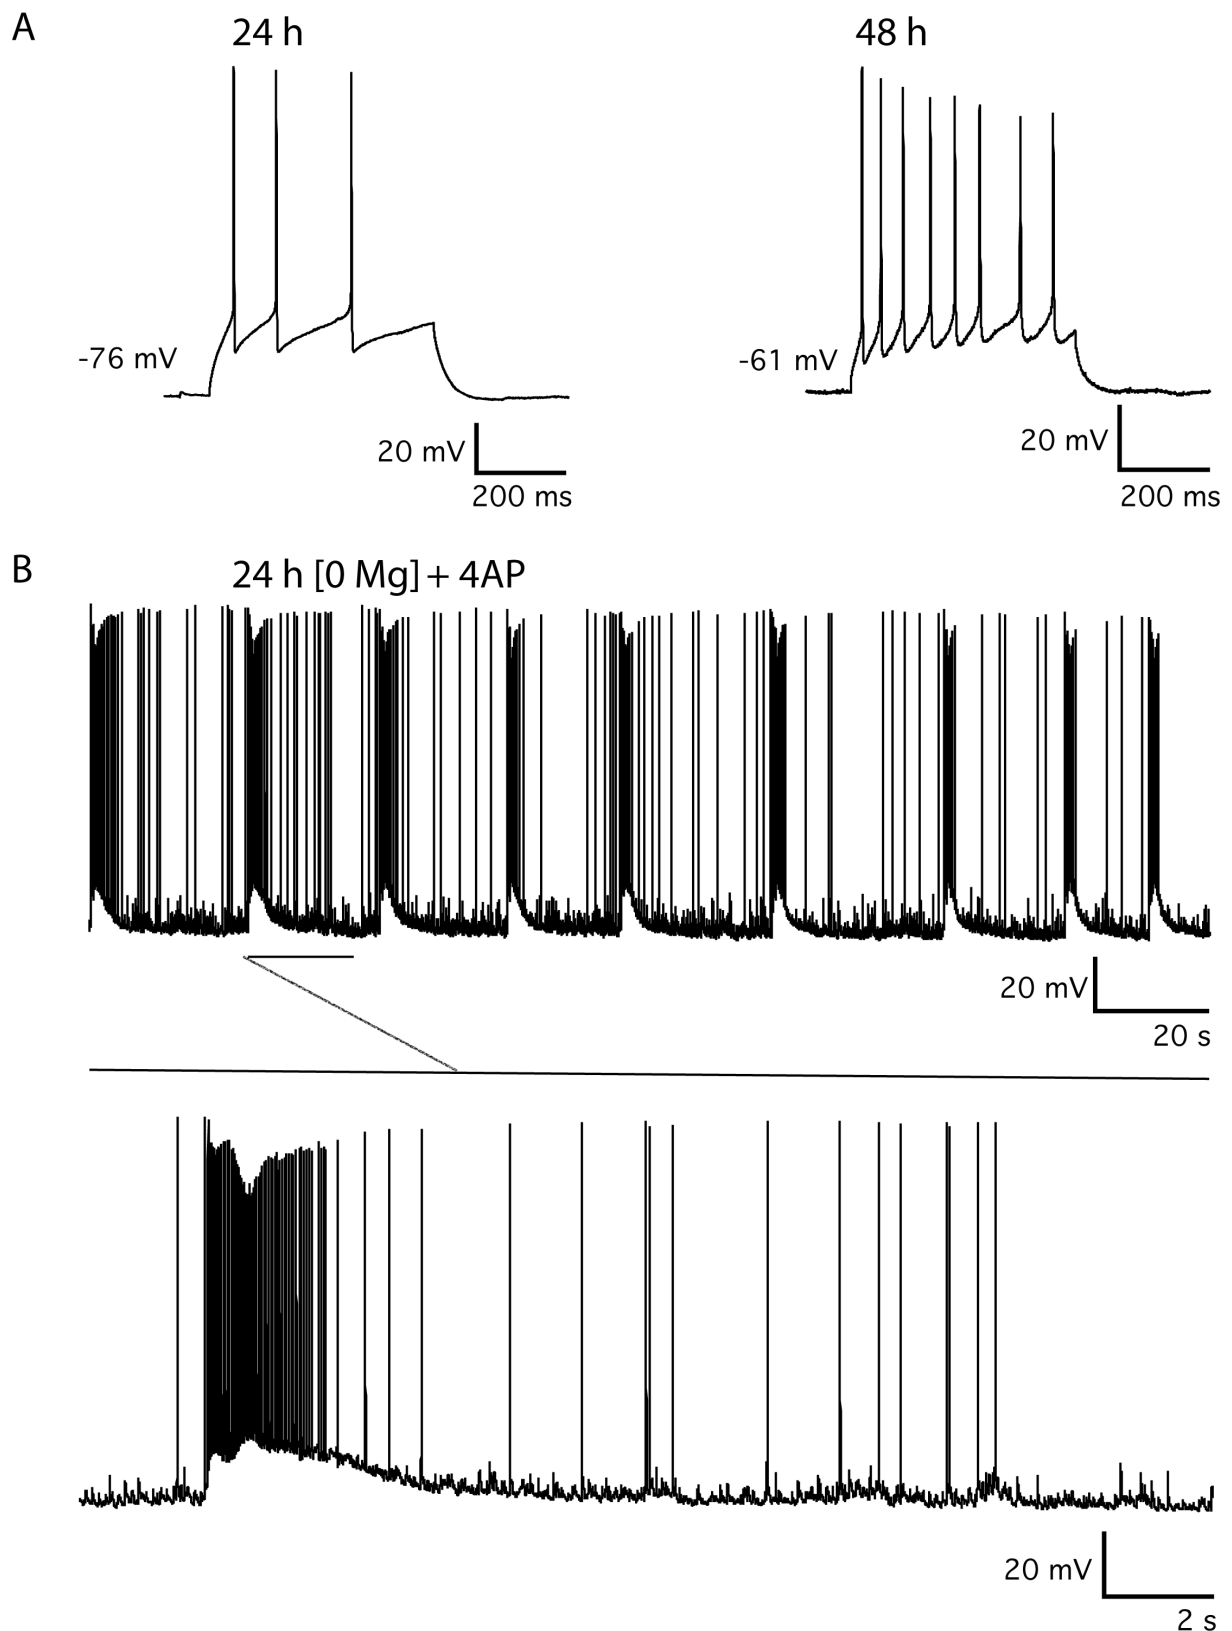

87  
 88 **Supplementary Figure 7. Recordings from human cortical slices after 24 and 48**  
 89 **hours of incubation.** A. Example sweeps of neurons recorded after 24 or 48 hours of  
 90 incubation in slices from the same patient tissue, from a patient diagnosed with Focal  
 91 Cortical dysplasia type II. Neurons respond with action potentials to current injection. B,  
 92 Example sweep from a cortical neuron after 24 hours of slice incubation show robust

93 bursting activity in  $0\text{Mg}^{2+}$  and 4-AP (100  $\mu\text{m}$ ) aCSF, with a regular occurring burst  
94 pattern (magnified in the lower panel).  
95

96

97 **Supplementary Table 1. Antibodies**

| <b>Primary Ab</b> | <b>Raised in</b> | <b>Dilution</b> | <i>Provider</i>          | <b>Secondary</b> | <i>Provider</i>                              |
|-------------------|------------------|-----------------|--------------------------|------------------|----------------------------------------------|
| <b>NeuN</b>       | Rabbit           | 1:500           | <i>Abcam (ab104225)</i>  | Alexa Fluor 488  | <i>Jackson ImmunoResearch (#711-545-152)</i> |
| <b>Cas3</b>       | Rabbit           | 1:200           | <i>Abcam (ab2302)</i>    | Cy3              | <i>Jackson ImmunoResearch (#711-165-152)</i> |
| <b>NPY</b>        | Rabbit           | 1:500           | <i>Sigma (N9528)</i>     | Cy3              | <i>Jackson ImmunoResearch (#711-165-152)</i> |
| <b>GFAP</b>       | Mouse            | 1:500           | <i>Sigma (G3893)</i>     | Alexa Fluor 488  | <i>Jackson ImmunoResearch (#715-545-150)</i> |
| <b>Iba1</b>       | Rabbit           | 1:500           | <i>WAKO (#019-19741)</i> | Cy3              | <i>Jackson ImmunoResearch (#711-165-152)</i> |

98

99

100 **Supplementary Table 2. Immunohistochemical quantification**

**Patient 1**

|                                | 0h (mean±SD)       | 24h (mean±SD)      |
|--------------------------------|--------------------|--------------------|
| <b>NeuN+CASP3</b>              |                    |                    |
| NeuN/mm2                       | 89,6025 ± 3,3109   | 152,5125 ± 10,3863 |
| CASP3/mm2                      | 3,7567 ± 0,2416    | 8,8689 ± 2,2070    |
| CASP3/NeuN                     | 0,0420 ± 0,0041    | 0,0577 ± 0,0117    |
| <b>NPY + NeuN</b>              |                    |                    |
| NPY/mm2                        | 0,1821 ± 0,0273    | 0,0821 ± 0,0182    |
| <b>Iba1</b>                    |                    |                    |
| Ramified (part of total n)     | 0,8022 ± 0,0455    | 0,0128 ± 0,0177    |
| Intermediate (part of total n) | 0,1935 ± 0,0405    | 0,7358 ± 0,1235    |
| Activated (part of total n)    | 0,0043 ± 0,0086    | 0,2514 ± 0,1253    |
| Iba1/mm2                       | 16,7397 ± 2,8295   | 17,9780 ± 1,8061   |
| <b>GFAP</b>                    |                    |                    |
| Mean Grey Value                | 14,4695 ± 4,2334   | 21,903 ± 6,3447    |
| Min Grey Value                 | 3,25 ± 1,2583      | 6 ± 2,1602         |
| Max Grey Value                 | 48 ± 4,8305        | 64,25 ± 5,3151     |
| Integrated Optical Density     | 14469452 ± 4233209 | 21902929 ± 6344678 |
| Corrected Total Fluorescence   | 10838702 ± 3672283 | 16875679 ± 4846690 |

**Patient 2**

|                                | 0h (mean±SD)      | 3h (mean±SD)      | 24h (mean±SD)      | 48h (mean±SD)      |
|--------------------------------|-------------------|-------------------|--------------------|--------------------|
| <b>NeuN+CASP3</b>              |                   |                   |                    |                    |
| NeuN/mm2                       | 78,0309 ± 20,2153 | 95,8512 ± 15,1702 | 133,8846 ± 16,3634 | 118,8438 ± 11,4896 |
| CASP3/mm2                      | 5,1616 ± 2,6947   | 3,5644 ± 1,5470   | 37,9356 ± 9,5290   | 13,6988 ± 1,4512   |
| CASP3/NeuN                     | 0,0628 ± 0,0190   | 0,0384 ± 0,0209   | 0,2807 ± 0,0415    | 0,1167 ± 0,0209    |
| <b>NPY + NeuN</b>              |                   |                   |                    |                    |
| NPY/mm2                        | 0,1170 ± 0,0348   | 0,0956 ± 0,0545   | 0,1733 ± 0,0483    | 0,1011 ± 0,0249    |
| <b>Iba1</b>                    |                   |                   |                    |                    |
| Ramified (part of total n)     | 0,6857 ± 0,0795   | 0,6645 ± 0,0503   | 0,1555 ± 0,0271    | 0,0212 ± 0,0235    |
| Intermediate (part of total n) | 0,3101 ± 0,0782   | 0,3295 ± 0,0396   | 0,6587 ± 0,0844    | 0,3390 ± 0,0452    |
| Activated (part of total n)    | 0,0042 ± 0,0085   | 0,0060 ± 0,0119   | 0,1858 ± 0,0638    | 0,6409 ± 0,0602    |
| Iba1/mm2                       | 20,0916 ± 3,2206  | 14,8407 ± 1,1568  | 15,1987 ± 4,2766   | 12,2121 ± 3,3140   |
| <b>GFAP</b>                    |                   |                   |                    |                    |
| Mean Grey Value                | 3,0025 ± 1,5489   | 3,2898 ± 1,7839   | 3,3668 ± 1,3488    | 4,7368 ± 2,4647    |

|                              |                           |                           |                           |                           |
|------------------------------|---------------------------|---------------------------|---------------------------|---------------------------|
| Min Grey Value               | 1 ± 0,8165                | 1 ± 0,8165                | 0,5 ± 0,5774              | 1,25 ± 0,5                |
| Max Grey Value               | 17,5 ± 3,6968             | 20 ± 1,4142               | 16,75 ± 6,8981            | 19,75 ± 6,5               |
| Integrated Optical Density   | 3002570,371 ± 1548683,659 | 3289696,297 ± 1784036,208 | 3366888,272 ± 1349011,812 | 4736642,902 ± 2464396,814 |
| Corrected Total Fluorescence | 1723820,371 ± 390026,7633 | 1745446,297 ± 570866,666  | 1543388,272 ± 514589,9606 | 2610642,902 ± 1400450,784 |

### Patient 3

|                                | 0h (mean±SD)              | 3h (mean±SD)              | 24h (mean±SD)             | 48h (mean±SD)             |
|--------------------------------|---------------------------|---------------------------|---------------------------|---------------------------|
| <b>NeuN+CASP3</b>              |                           |                           |                           |                           |
| NeuN/mm2                       | 102,4970 ± 11,2607        | 103,6369 ± 18,8157        | 126,7554 ± 13,0993        | 153,6422 ± 9,9249         |
| CASP3/mm2                      | 10,4420 ± 3,1706          | 8,8764 ± 3,6337           | 18,5323 ± 1,3005          | 14,3525 ± 2,3525          |
| CASP3/NeuN                     | 0,1016 ± 0,0269           | 0,0829 ± 0,0221           | 0,1466 ± 0,0057           | 0,0931 ± 0,0117           |
| <b>NPY + NeuN</b>              |                           |                           |                           |                           |
| NPY/mm2                        | 0,0966 ± 0,0222           | 0,0990 ± 0,0347           | 0,2014 ± 0,0430           | 0,2239 ± 0,0741           |
| <b>Iba1</b>                    |                           |                           |                           |                           |
| Ramified (part of total n)     | 0,7403 ± 0,0529           | 0,5889 ± 0,0045           | 0,1123 ± 0,0180           | 0,0426 ± 0,0321           |
| Intermediate (part of total n) | 0,2389 ± 0,0494           | 0,3871 ± 0,0326           | 0,7839 ± 0,0601           | 0,3142 ± 0,0644           |
| Activated (part of total n)    | 0,0208 ± 0,0315           | 0,0240 ± 0,0326           | 0,1038 ± 0,0604           | 0,6431 ± 0,0918           |
| Iba1/mm2                       | 19,4072 ± 0,9051          | 15,9378 ± 2,7591          | 13,6946 ± 1,4200          | 18,9017 ± 3,3424          |
| <b>GFAP</b>                    |                           |                           |                           |                           |
| Mean Grey Value                | 6,0343 ± 2,2426           | 5,7598 ± 2,7459           | 4,9630 ± 2,2873           | 4,4578 ± 0,9780           |
| Min Grey Value                 | 1,75 ± 0,5                | 1,75 ± 0,9574             | 1,5 ± 0,5774              | 1 ± 0                     |
| Max Grey Value                 | 40,25 ± 3,4034            | 47,5 ± 7,3711             | 40 ± 3,8297               | 48,75 ± 6,2383            |
| Integrated Optical Density     | 6034299,692 ± 2242573,163 | 5760008,642 ± 2746017,655 | 4962900,926 ± 2287307,986 | 4457829,012 ± 978016,9915 |
| Corrected Total Fluorescence   | 3064299,692 ± 1570785,603 | 2946008,642 ± 1583169,743 | 2474650,926 ± 1120801,533 | 2858329,012 ± 641258,6406 |

### Patient 4

|                   | 0h (mean±SD)     | 3h (mean±SD)    | 24h (mean±SD)    | 48h (mean±SD)    |
|-------------------|------------------|-----------------|------------------|------------------|
| <b>NeuN+CASP3</b> |                  |                 |                  |                  |
| NeuN/mm2          | 269,362 ± 15,702 | 283,555 ± 7,701 | 284,898 ± 18,695 | 276,220 ± 27,993 |
| CASP3/mm2         | 19,165 ± 4,105   | 30,537 ± 11,717 | 29,0439 ± 13,348 | 21,308 ± 4,796   |
| CASP3/NeuN        | 0,0711 ± 0,0140  | 0,108 ± 0,0425  | 0,1 ± 0,0399     | 0,0767 ± 0,0111  |
| <b>NPY + NeuN</b> |                  |                 |                  |                  |
| NPY/mm2           | 0,26384 ± 0,0756 | 0,4258 ± 0,096  | 0,489 ± 0,0496   | 0,325 ± 0,116    |
| <b>Iba1</b>       |                  |                 |                  |                  |

|                                |                       |                       |                     |                   |
|--------------------------------|-----------------------|-----------------------|---------------------|-------------------|
| Ramified (part of total n)     | 0,7229 ±<br>0,04669   | 0,6771 ±<br>0,0405    | 0,0931 ± 0,0281     | 0,0452 ± 0,0322   |
| Intermediate (part of total n) | 0,2738 ±<br>0,0401    | 0,2955 ±<br>0,0279    | 0,8151 ± 0,0965     | 0,3686 ± 0,0225   |
| Activated (part of total n)    | 0,00333 ±<br>0,00667  | 0,02737 ±<br>0,02195  | 0,0918 ±<br>0,07349 | 0,5861 ± 0,0518   |
| Iba1/mm2                       | 26,112 ±<br>1,652     | 22,372 ±<br>7,489     | 13,773 ± 4,249      | 13,608 ± 2,853    |
|                                |                       |                       |                     |                   |
| <b>GFAP</b>                    |                       |                       |                     |                   |
| Mean Grey Value                | 12,277 ±<br>3,5612    | 14,1798 ±<br>8,361    | 15,375 ± 6,805      | 9,656 ± 5,6399    |
| Min Grey Value                 | 3,75 ±<br>0,9574      | 4,25 ±<br>2,0616      | 4,25 ± 2,0616       | 2,5 ± 0,58        |
| Max Grey Value                 | 49,75 ±<br>3,304      | 48,25 ±<br>10,436     | 59 ± 18,89          | 43,5 ± 4,7258     |
| Integrated Optical Density     | 12276490 ±<br>3561308 | 14179769 ±<br>8360652 | 15374764 ± 6804925  | 9656189 ± 3829977 |
| Corrected Total Fluorescence   | 7120990<br>±2133528   | 8634269 ±<br>6048047  | 9266014 ± 4752328   | 5240689 ± 3829977 |

101
